# Supplementary material
Source: HighWire-hosted journal article supplement (https://www.cmajopen.ca/highwire/filestream/87415/field_highwire_adjunct_files/1/open-2020-0210-2-at.pdf)
Supplement: open-2020-0210-2-at.pdf [file open-2020-0210-2-at.pdf]

## Appendix 2. Survey completed by PCPs using the Fraser RACE service

### Rapid Access to Consultative Expertise

Date: \_\_\_\_\_

Time of call/page from FP: \_\_\_\_\_

Start of call: \_\_\_\_\_

End of call: \_\_\_\_\_

Caller: Dr. \_\_\_\_\_

Caller billing #: \_\_\_\_\_

Specialist: Dr. \_\_\_\_\_

Patient: \_\_\_\_\_

PHN: \_\_\_\_\_

DOB: \_\_\_\_\_

Diagnosis: \_\_\_\_\_

Advice given: \_\_\_\_\_

**1. In your opinion (FP) did the RACE telephone conversation avoid**

**a consult**      ☐ Yes    ☐ No

**an ER visit**    ☐ Yes    ☐ No

**2. Reason for call from FP:**

☐ Advice on diagnostic testing

☐ Advice on management

☐ Advice on therapeutics

☐ Other \_\_\_\_\_

**3. Specialist Recommendation:**

☐ Additional diagnostic testing

☐ Specialist follow-up required and referred

☐ Medication recommendation

☐ Reassurance of FP care plan

☐ Referred to ER

☐ More info needed

☐ Other \_\_\_\_\_

**Fax form/dictation to: [Contact Number Redacted]**

Revised May 03, 2011
